# Supplementary material
Source: Springer Nature journal article supplement (https://www.springermedizin.de/resource/supplementary/12879_2010_1898_MOESM3_ESM.pdf/9443984)

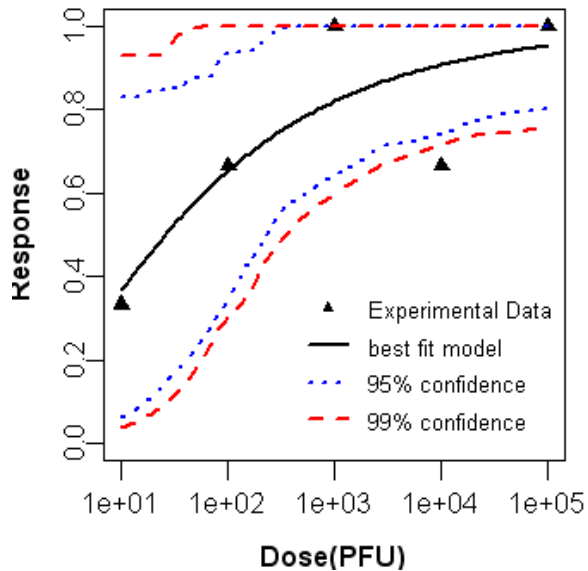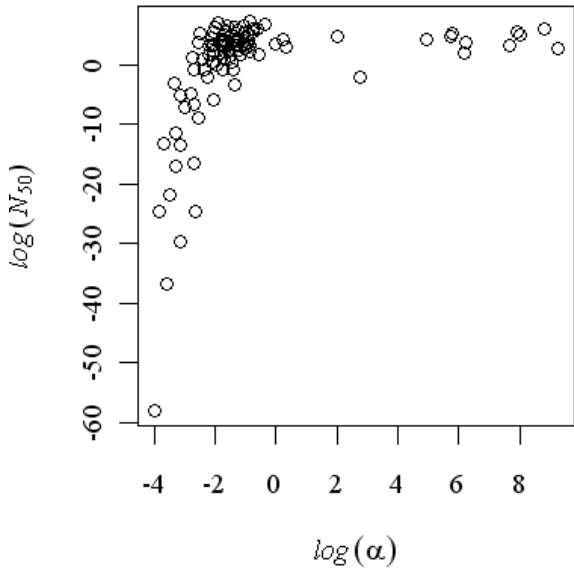

Supplement: MOESM3 [file 9443984]
